# Supplementary material
Source: publisher figshare collection journal article supplement (https://acs.figshare.com/ndownloader/files/10990826)
Supplement: Supplementary file 1 [file 10990826]

# SUPPORTING INFORMATION

## **Superhydrophobic Hexamethylene Diisocyanate (HMDI) Modified Hydrolyzed Polymers of Intrinsic Microporosity (PIM-1) Electrospun Ultrafine Fibrous Membrane for Adsorption of Organic Compounds and Oil-Water Separation**

*Bekir Satilmis<sup>a, b\*</sup> and Tamer Uyar<sup>a\*</sup>*

<sup>a</sup>Institute of Materials Science & Nanotechnology, UNAM-National Nanotechnology Research Center, Bilkent University, Ankara 06800, Turkey

<sup>b</sup>Department of Chemistry, Faculty of Science and Arts, Ahi Evran University, Kirsehir 40100, Turkey

\*Corresponding Authors: B.S: [bekir.satilmis@ahievran.edu.tr](mailto:bekir.satilmis@ahievran.edu.tr); T.U: [uyar@unam.bilkent.edu.tr](mailto:uyar@unam.bilkent.edu.tr)

### CONTENT

|                                                           |     |
|-----------------------------------------------------------|-----|
| 1. Characterization of PIM-1 and hydrolyzed PIM-1 powders | S-1 |
| 2. Optimization of the membrane production                | S-2 |
| 3. Organic and oil adsorption                             | S-5 |

## 1. Characterization of PIM-1 and hydrolyzed PIM-1 powders

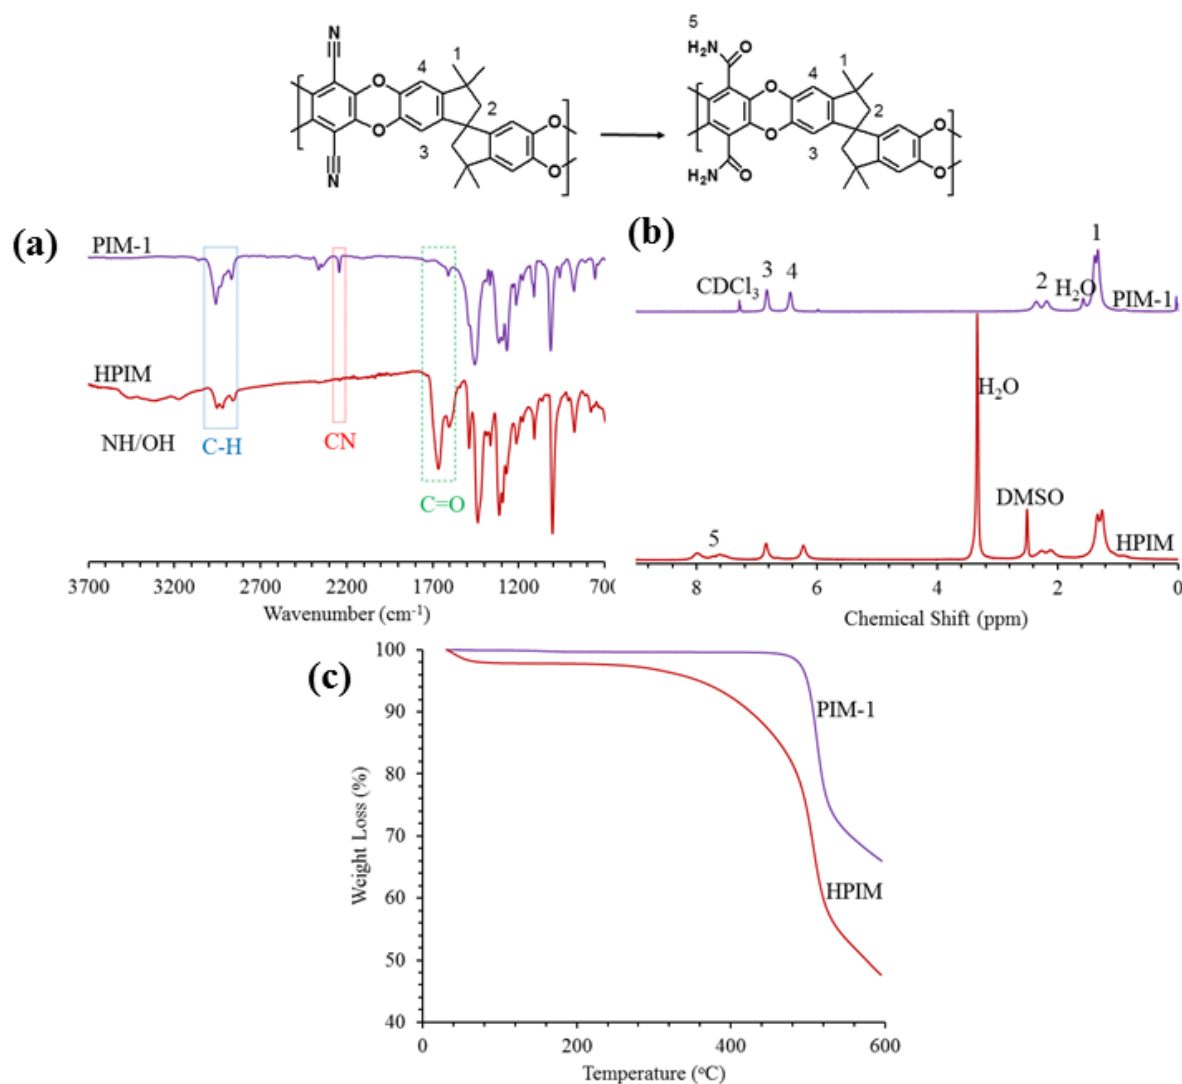

**Figure S1.** (a) ATR-IR spectra, (b)  $^1\text{H}$ -NMR spectra, (c) TGA curves of PIM-1 and hydrolyzed PIM-1.

ATR-IR spectra of PIM-1 and hydrolyzed PIM-1 are depicted in Figure S1(a). PIM-1 shows characteristic nitrile (CN) stretches at  $2240\text{ cm}^{-1}$  along with aromatic and aliphatic C-H stretches around  $3000\text{ cm}^{-1}$  for. After hydrolysis the relative intensity of nitrile is reduced and new bands appeared in the region  $3000\text{--}3500\text{ cm}^{-1}$  along with a carbonyl peak at  $\sim 1700\text{ cm}^{-1}$  that indicates amide structure and it also shows no significant carboxylic acid structure.  $^1\text{H}$ -NMR spectra of PIM-1 and HPIM are displayed in Figure S1(b) showing four different proton

environments for PIM-1. In addition, HPIM shows amide proton signals in the region 7.5 to 8.2 ppm and no more peaks appeared around 14 ppm showing no carboxylic acid protons. Thus, we have obtained fully hydrolyzed PIM-1 which has dominantly amide functionality. Thermal properties of PIM-1 and HPIM are studied using thermogravimetric analysis technique that shows both PIM-1 and HPIM are thermally stable. Although PIM-1 starts degrading at 450 °C (Figure S1c), HPIM shows slight weight loss below 100 °C due to the residuals and polymer start degrading around 250 °C indicating functional group degradation. The results are in good agreement with previous studies and indicates complete hydrolysis of PIM-1.<sup>1-4</sup>

## **2. Optimization of the membrane production**

To optimize the process of membrane production, crosslinking stage has been investigated comprehensively by using several observations. First, spinning solution has been stirred in room temperature for a couple of days and no significant precipitation has been observed (Figure S2a). Then, this solution has been heated up to 100 °C for a couple of hours that showed no sign of crosslinking. Further stirrings for a couple of days at this temperature caused slight precipitation (Figure S2a). As a result, we have determined that the crosslinking reaction between HPIM and HMDI can barely start with the help of heat in the solution. In addition, drying method of the fibers has also been examined. Two pieces of HMDI/HPIM-FM were dried at room temperature for overnight and at 150 °C for 2h to distinguish the effect of the drying method. Both samples became insoluble and they displayed different visual characteristics (Figure S2b). In addition, the infrared spectrum of the sample which is dried in high temperature has indicated more completed reaction. The carbonyl peaks turned into one single peaks that indicates the formation of urethane linkage at 150 °C spectrum unlike room temperature spectrum. Therefore, it was concluded that high temperature not only helps to remove DMF from membrane but also catalyze the crosslinking reaction which can be seen in

Figure S3. It was found that the membrane dried at different temperatures have similar fiber diameter distributions. SEM images of both samples are also provided in Figure S4.

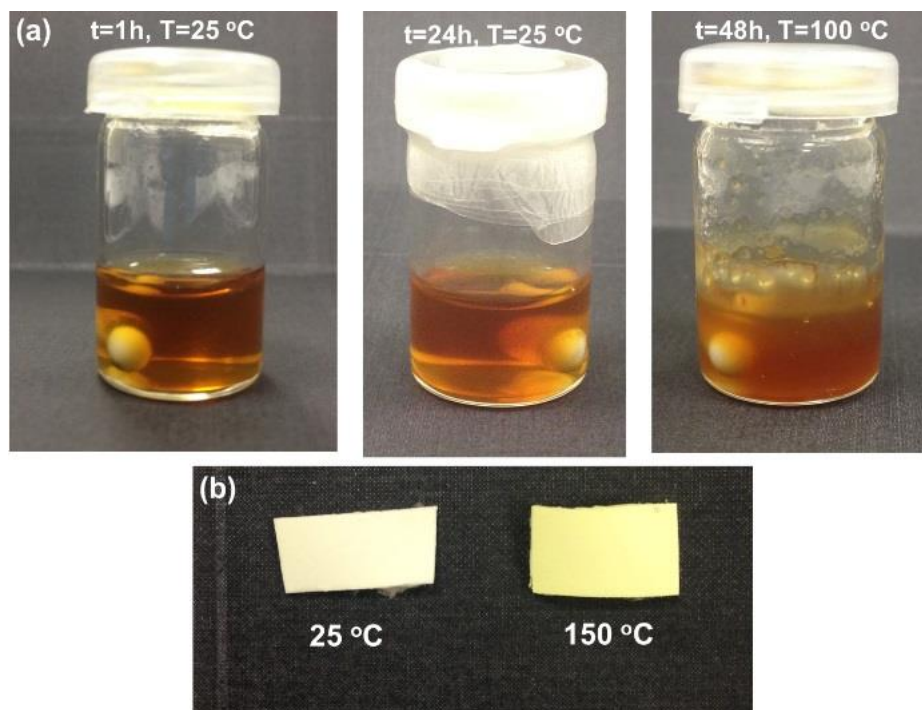

**Figure S2:** Digital images of (a) the mixture of HMDI/HPIM spinning solutions at different temperatures and times, (b) fibrous membrane of HMDI/HPIM dried at different temperatures.

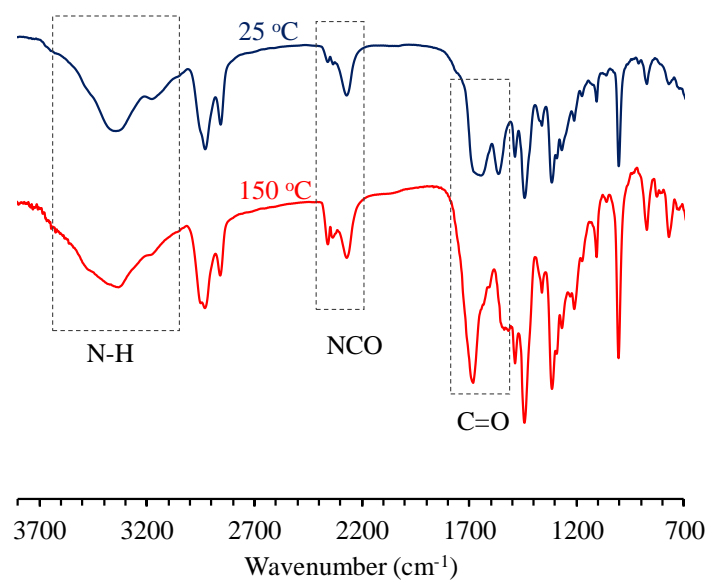

**Figure S3:** Infrared Spectra of HMDI/HPIM-FMs dried at room temperature (25 °C) and 150 °C.

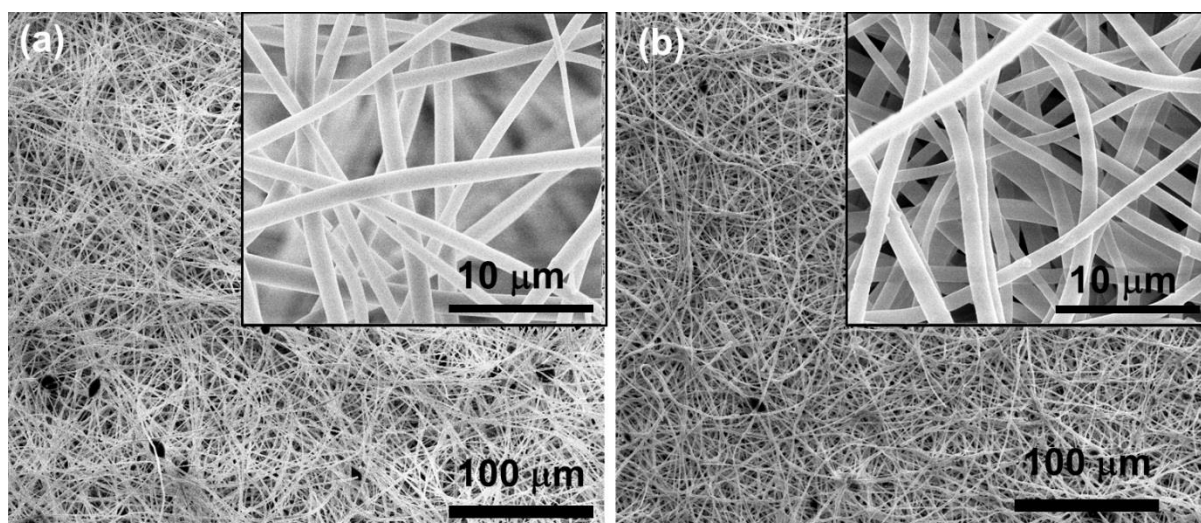

**Figure S4:** SEM images of HMDI/HPIM-FMs (a) dried at room temperature, (b) dried at 150 °C and inset pictures are the higher magnifications of the images.

### 3. Organic and oil adsorption experiment

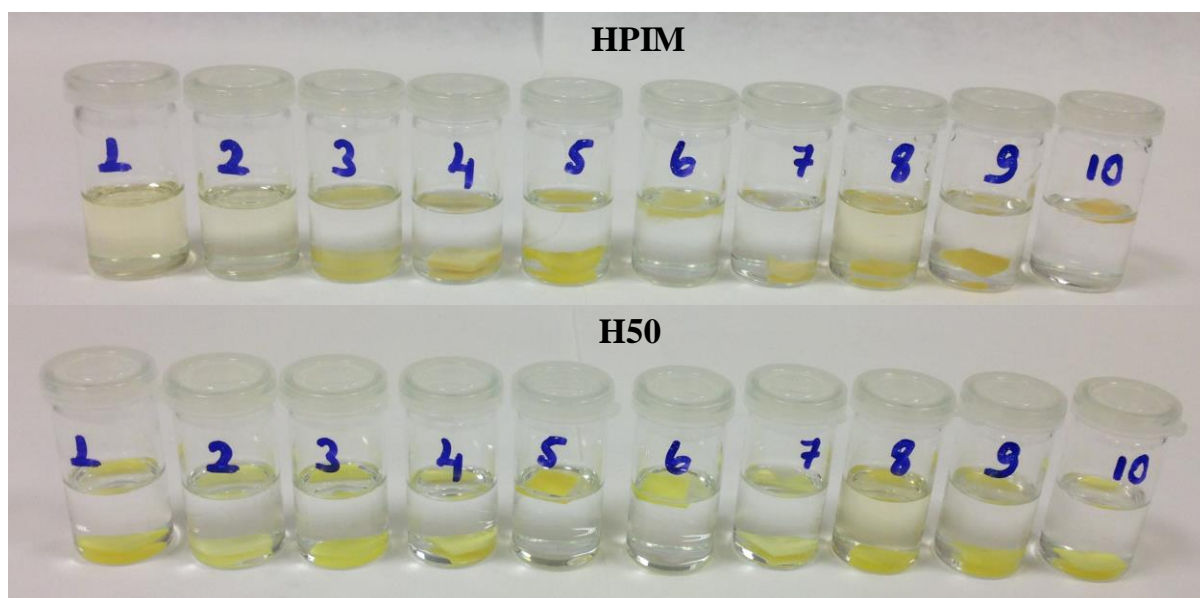

**Figure S5.** Weight based adsorption capacities of HPIM and H50 on different organic compounds (1) DMSO, (2) DMF, (3) Toluene, (4) Hexane, (5) DCM, (6) Chloroform, (7) Methanol, (8) Olive oil, (9) Pump oil and (10) silicone oil.

**Table S1:** Organic solvent and oils used for adsorption experiments and the weights of membranes before and after adsorption.

| Adsorbed organic | HPIM Weight (g) |       | H50 Weight (g) |       | % Weight gain |      |
|------------------|-----------------|-------|----------------|-------|---------------|------|
|                  | Before          | After | Before         | After | HPIM          | H50  |
| Silicone oil     | 0.011           | 0.27  | 0.011          | 0.27  | 2300          | 2400 |
| Pump oil         | 0.008           | 0.26  | 0.012          | 0.17  | 3200          | 1300 |
| Sunflower oil    | 0.005           | 0.18  | 0.008          | 0.13  | 3400          | 1500 |
| Methanol         | 0.007           | 0.15  | 0.008          | 0.10  | 2000          | 1200 |
| Chloroform       | 0.007           | 0.25  | 0.010          | 0.21  | 3400          | 2000 |
| DCM              | 0.006           | 0.18  | 0.010          | 0.17  | 2800          | 1600 |
| Hexane           | 0.011           | 0.18  | 0.010          | 0.08  | 1500          | 700  |
| Toluene          | 0.006           | 0.15  | 0.008          | 0.08  | 2400          | 1000 |
| DMF              | 0.003           |       | 0.007          | 0.10  |               | 1400 |
| DMSO             | 0.006           |       | 0.013          | 0.24  |               | 1700 |

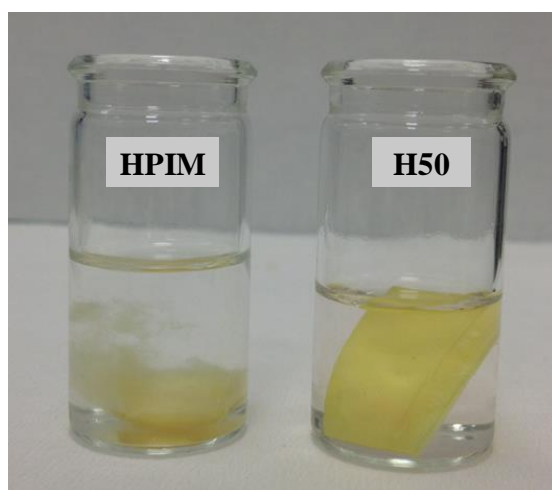

**Figure S6.** Stability of fibrous membranes in oil HPIM (left) and H50 (right).

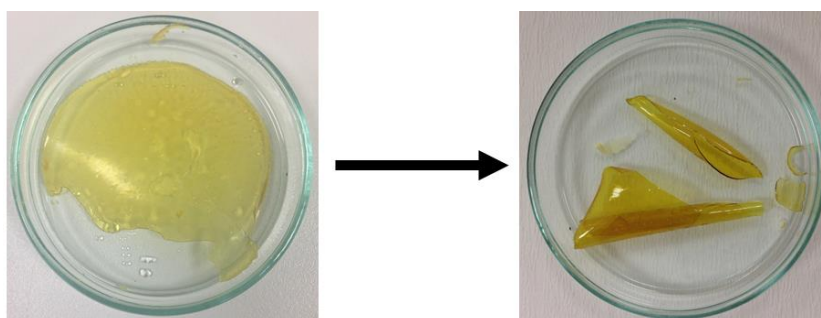

**Figure S7:** Dense membrane (film) form of HMDI/HPIM-FMs (left) before heat treatment and (right) after heat treatment.



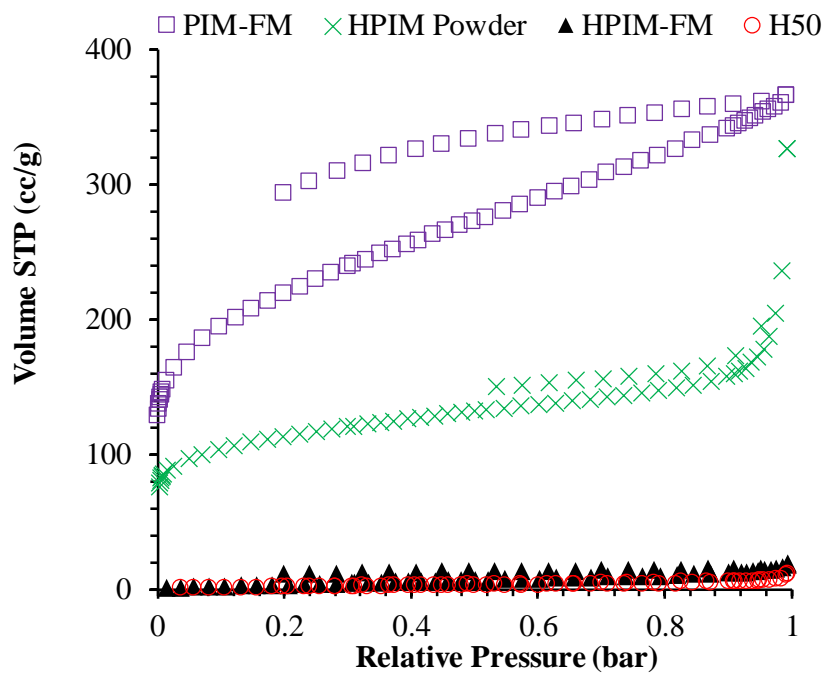

**Figure S8:** N<sub>2</sub> adsorption/desorption isotherms of samples.

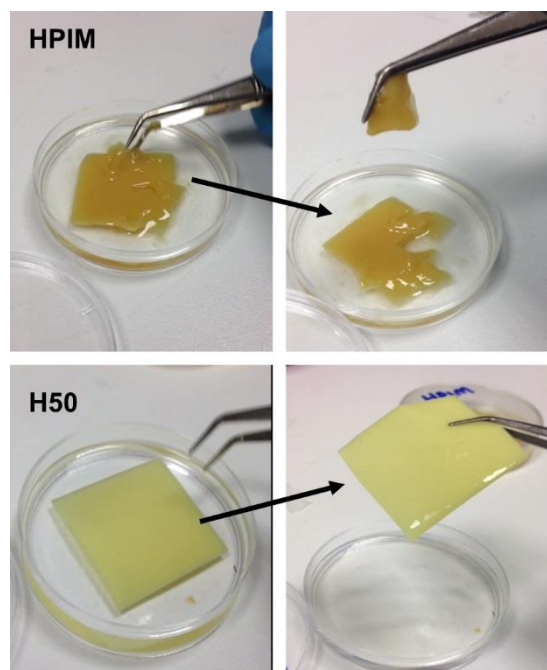

**Figure S9:** Digital images showing the structural stability of HPIM and H50 after isopropanol adsorption.



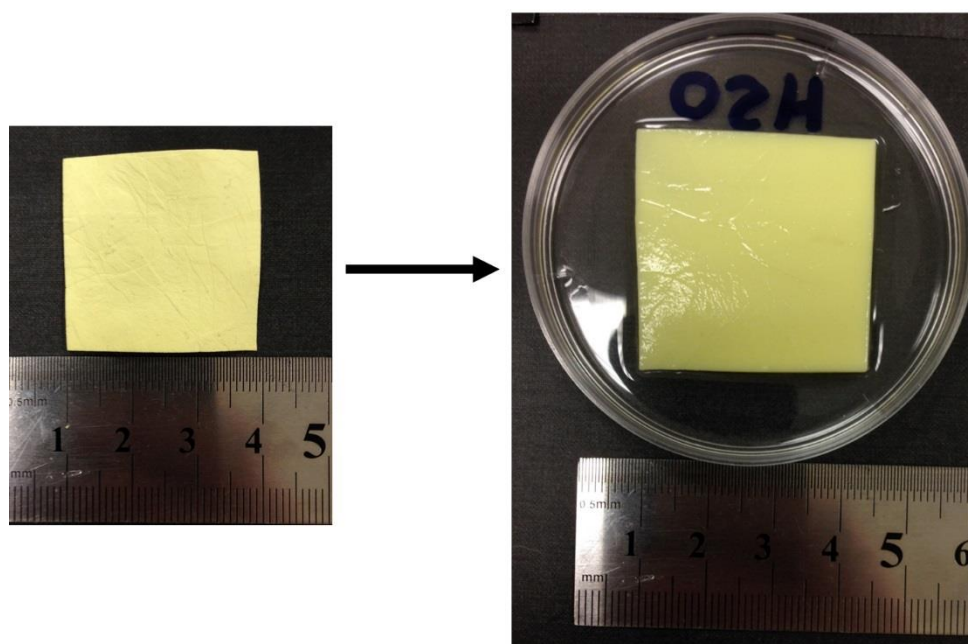

**Figure S10:** Digital images of H50 showing dimension changes of the membrane (left) before and (right) after isopropanol adsorption.

**Table S2:** Comparison of adsorption capacities of oil adsorbents based on their form.

| Material                       | Oil uptake (g/g) | Form      | Reference |
|--------------------------------|------------------|-----------|-----------|
| Polypropylene                  | 10-25            | fiber/web | [5-6]     |
| Polyvinyl-Alcohol Formaldehyde | 14-57            | sponge    | [7]       |
| Cellulose aerogels             | 59               | aerogel   | [8]       |
| Polystyrene                    | 80-130           | fiber     | [9]       |
| Porous polyimide               | 57               | fiber     | [10]      |
| Hydrophobic cotton             | 12               | fiber     | [11]      |
| HMDI/HPIM-FMs                  | 13-25            | fiber     | This work |

## REFERENCES

- (1) Budd, P. M.; Ghanem, B. S.; Makhseed, S.; McKeown, N. B.; Msayib, K. J.; Tattershall, C. E. Polymers of Intrinsic Microporosity (PIMs): Robust, Solution-Processable, Organic Nanoporous Materials. *Chem. Commun.* **2004**, 230-231.
- (2) Satilmis, B.; Budd, P. M. Base-Catalysed Hydrolysis of PIM-1: Amide Versus Carboxylate Formation. *RSC Adv.* **2014**, 4, 52189-52198.
- (3) Santoso, B.; Yanaranop, P.; Kang, H.; Leung, I. K. H.; Jin, J. A Critical Update on the Synthesis of Carboxylated Polymers of Intrinsic Microporosity (C-PIMs). *Macromolecules* **2017**, 50, 3043-3050.
- (4) Jeon, J. W.; Kim, D.-G.; Sohn, E.-H.; Yoo, Y.; Kim, Y. S.; Kim, B. G.; Lee, J.-C. Highly Carboxylate-Functionalized Polymers of Intrinsic Microporosity for CO<sub>2</sub>-Selective Polymer Membranes. *Macromolecules* **2017**, 50, 8019-8027.
- (5) Choi, H. M. Needle-punched Cotton Nonwovens and Other Natural Fibers as Oil Cleanup Sorbents. *J Environ Sci Health A Tox Hazard Subst Environ Eng.* **1996**, 31, 1441-1457.
- (6) Lin, C.; Hong, Y.-J.; Hu, A. H. Using a Composite Material Containing Waste Tire Powder and Polypropylene Fiber Cut End to Recover Spilled Oil. *Waste Manage* **2010**, 30, 263-267.
- (7) Pan, Y.; Shi, K.; Peng, C.; Wang, W.; Liu, Z.; Ji, X. Evaluation of Hydrophobic Polyvinyl-Alcohol Formaldehyde Sponges As Absorbents for Oil Spill. *ACS Appl. Mater. Interfaces* **2014**, 6, 8651-8659.
- (8) Liao, Q.; Su, X.; Zhu, W.; Hua, W.; Qian, Z.; Liu, L.; Yao, J. Flexible and Durable Cellulose Aerogels for Highly Effective Oil/Water Separation. *RSC Adv.* **2016**, 6, 63773-63781.
- (9) Wu, J.; Wang, N.; Wang, L.; Dong, H.; Zhao, Y.; Jiang, L. Electrospun Porous Structure Fibrous Film with High Oil Adsorption Capacity. *ACS Appl. Mater. Interfaces* **2012**, 4, 3207-3212.
- (10) Tian, L.; Zhang, C.; He, X.; Guo, Y.; Qiao, M.; Gu, J.; Zhang, Q. Novel Reusable Porous Polyimide Fibers for Hot-Oil Adsorption. *J. Hazard. Mater.* **2017**, 340, 67-76.
- (11) Deschamps, G.; Caruel, H.; Borredon, M.-E.; Bonnin, C.; Vignoles, C. Oil Removal from Water by Selective Sorption on Hydrophobic Cotton Fibers. 1. Study of Sorption Properties and Comparison with Other Cotton Fiber-Based Sorbents. *Environ. Sci. Technol.* **2003**, 37, 1013-1015.
